# Supplementary material for: Design and synthesis of thermally robust pyrazine–tetrazole hybrids as high-nitrogen energetic materials
Source: Royal Society of Chemistry journal article supplement (doi:10.1039/d5ma01131k), 2025-01-01
Supplement: d5ma01131k1.pdf [file d5ma01131k1.pdf]

## Electronic Supplementary Information

### Design and Synthesis of Thermally Robust Pyrazine–Tetrazole Hybrids as High-Nitrogen Energetic Materials

Jatinder Singh,<sup>a</sup> Richard J. Staples,<sup>b</sup> Jean'ne M. Shreeve<sup>\*a</sup>

<sup>a</sup> Department of Chemistry, University of Idaho, Moscow, Idaho, 83844-2343,  
United States.

<sup>b</sup> Department of Chemistry, Michigan State University, East Lansing, Michigan  
48824, United States.

#### Corresponding Author

**Jean'ne M. Shreeve** – Department of Chemistry, University of Idaho, Moscow, Idaho 83844-  
2343, United States.

Email: [jshreeve@uidaho.edu](mailto:jshreeve@uidaho.edu); Fax: (+1) 208-885-5173.

---

#### Table of contents

| Section | Contents                                                | Page No. |
|---------|---------------------------------------------------------|----------|
| S1      | Experimental section                                    | S2       |
| S2      | X-ray crystallography details and crystallographic data | S4       |
| S3      | Enthalpy of formation                                   | S5       |
| S4      | References                                              | S11      |
| S5      | Spectrum Analysis                                       | S12      |

## Section S1. Experimental section

### Section S1.1. *Caution!*

The new compounds are energetic materials which show increased sensitivity toward various stimuli (e.g., higher temperatures, impact, and friction). Proper safety precautions such as leather gloves, face shield, and eye protection must be taken at all times while synthesizing and handling these materials. All materials should be synthesized in milligram amounts. Wear personal protective equipment while handling hydrazine hydrate and use only in fume hood.

### Section S1.2. General methods

All reagents (analytical grade) were purchased from AK Scientific, VWR or Oakwood Chemicals and were used as supplied.  $^1\text{H}$ ,  $^{13}\text{C}$ ,  $^{14}\text{N}$  and  $^{15}\text{N}$  NMR spectra were recorded using a 500 MHz (Bruker AVANCE 500) NMR spectrometer operating at 500.19, 125.78, 36.14, and 50.69 MHz, respectively. Chemical shifts in  $^1\text{H}$  and  $^{13}\text{C}$  NMR spectra are reported relative to  $\text{Me}_4\text{Si}$ ;  $^{14}\text{N}$  and  $^{15}\text{N}$  NMR spectra to  $\text{MeNO}_2$  as an external standard. Abbreviations for multiplicities and descriptors are: s = singlet, br = broad, m = multiplet (denotes complex pattern), and q = quartet. The decomposition points (onset temperature) were obtained on a differential scanning calorimeter (TA Instruments Company, Model: Q2000). Infrared spectra were recorded on a FT-IR spectrometer (Thermo Nicolet 6700) equipped with an ATR assembly. The densities were measured at ambient temperatures by employing a gas pycnometer (Micromeritics AccuPyc II 1340). The impact and friction sensitivities were determined by using a standard BAM drop hammer and BAM friction tester. Elemental analyses were carried out on a Vario Micro cube Elementar Analyser.

### Section S1.3. Synthesis and characterization data

**Synthesis of P2, 1 and 3.** P2, 1 and 3 were obtained following literature procedures.<sup>1-2</sup>

**Synthesis of 2.** To a 100 mL round-bottomed flask was added **1** (2.00 g, 12.5 mmol, 1.0 equiv.), sodium azide (2.03 g, 31.2 mmol, 2.5 equiv.), and DMSO (10 mL). The reaction mixture was

stirred at reflux for 24 h. After cooling, HCl (1M, 50 mL) was added to the reaction mixture with vigorous stirring. The reaction mixture was heated at 50 °C, cooled and the resulting precipitate was filtered and washed with distilled water (3 x 30 mL) to obtain **2** as a brown solid. (**2**): Physical description: Amorphous brown solid. Isolated yield: (2.50 g, 81%);  $T_{\text{dec.}} = 305\text{ }^{\circ}\text{C}$ ;  $^1\text{H}$  NMR (500 MHz,  $d_6$ -DMSO): 11.3 (bs, 2H), 7.59 (bs, 4H);  $^{13}\text{C}$  NMR (125 MHz,  $d_6$ -DMSO): 155.2, 151.3, 130.2; IR ( $\tilde{\nu}$ ,  $\text{cm}^{-1}$ ): 3493, 3452, 3382, 3334, 1686, 1659, 1615, 1594, 1513, 1396, 1336, 1300, 1209, 1087, 1010, 848, 803; Calcd for  $\text{C}_6\text{H}_6\text{N}_{12}$ : C, 29.27; H, 2.46; N, 68.27. Found: C, 29.17; H, 2.70; N, 65.78.

**Synthesis of 5.** To a 100 mL round-bottomed flask was added **1** (2.00 g, 12.5 mmol, 1.0 equiv.), sodium azide (2.03 g, 31.2 mmol, 2.5 equiv.), zinc bromide (1.40 g, 6.3 mmol, 0.5 equiv.), and DMSO (10 mL). The reaction mixture was stirred at reflux for 24 h. After cooling, HCl (1M, 50 mL) was added to the reaction mixture with vigorous stirring. The reaction mixture was heated at 50 °C, cooled and the resulting precipitate was filtered and washed with distilled water (3 x 30 mL) to obtain **5** as a brown solid. (**5**): Physical description: Amorphous brown solid. Isolated yield: (2.60 g, 85%);  $T_{\text{dec.}} = 320\text{ }^{\circ}\text{C}$ ;  $^1\text{H}$  NMR (500 MHz,  $d_6$ -DMSO): 16.5 (bs, 2H), 6.88 (bs, 4H);  $^{13}\text{C}$  NMR (125 MHz,  $d_6$ -DMSO): 153.1, 144.2, 124.5; IR ( $\tilde{\nu}$ ,  $\text{cm}^{-1}$ ): 3461, 3426, 3325, 3229, 3175, 1639, 1580, 1514, 1412, 1309, 1236, 1080, 1010, 875; Calcd for  $\text{C}_6\text{H}_6\text{N}_{12}$ : C, 29.27; H, 2.46; N, 68.27. Found: C, 29.31; H, 2.45; N, 66.08.

**Synthesis of 6.** To red fuming acid (5 mL), stirred at 0 °C, was added compound **5** (1.00 g, 4.1 mmol, 1.0 equiv.) in small portions. Stirring continued at the same temperature for 1 h and the mixture was poured into ice (20 g). The resulting brown precipitate was filtered and washed with water (3 × 20 mL). (**6**): Physical description: Amorphous brown solid. Isolated yield: (1.00 g, 74%);  $T_{\text{dec.}} = 212\text{ }^{\circ}\text{C}$ ;  $^1\text{H}$  NMR (500 MHz,  $d_6$ -DMSO): 11.3 (bs, 4H);  $^{13}\text{C}$  NMR (125 MHz,  $d_6$ -

DMSO): 154.0, 148.8, 131.7; IR ( $\tilde{\nu}$ ,  $\text{cm}^{-1}$ ): 3415, 3250, 3126, 3011, 2942, 2852, 1749, 1649, 1491, 1384, 1309, 1257, 1192, 1167, 1113, 1049, 963, 896, 722; Calcd for  $\text{C}_6\text{H}_4\text{N}_{14}\text{O}_4$ : C, 21.44; H, 1.20; N, 58.33; Found: C, 21.40; H, 1.59.; N, 57.08.

## **Section S2. X-ray crystallographic details and crystallographic data**

### **Data collection**

Crystals with suitable dimensions were mounted on a nylon loop with Paratone oil. Data were collected using a XtaLAB Synergy, Dualflex, HyPix diffractometer equipped with an Oxford Cryosystems low-temperature device, operating at  $T = 99.9(4)$  K. The structures were solved with the ShelXT<sup>4</sup> solution program using dual methods and by using Olex2.<sup>5</sup> The model was refined with ShelXL<sup>6</sup> using full matrix least squares minimization on  $F^2$  (Table S1). The thermal ellipsoids and packing diagrams of X-ray structures in the main article and supplementary material are plotted using Diamond 3.2 software.

**Table S1:** Crystallographic data for **2.DMSO**.

| Compound                     | <b>2•2DMSO</b>                                                                |
|------------------------------|-------------------------------------------------------------------------------|
| CCDC #                       | 2492520                                                                       |
| Formula                      | C <sub>10</sub> H <sub>18</sub> N <sub>12</sub> O <sub>2</sub> S <sub>2</sub> |
| $D_{calc.}/\text{g cm}^{-3}$ | 1.509                                                                         |
| $m/\text{mm}^{-1}$           | 3.056                                                                         |
| FW                           | 402.48                                                                        |
| Color                        | yellow                                                                        |
| Shape                        | needle-shaped                                                                 |
| Size/mm <sup>3</sup>         | 0.26×0.08×0.03                                                                |
| $T/\text{K}$                 | 100.00(10)                                                                    |
| Crystal System               | triclinic                                                                     |
| Space Group                  | <i>P</i> -1                                                                   |
| $a/\text{\AA}$               | 7.70178(17)                                                                   |
| $b/\text{\AA}$               | 10.3479(3)                                                                    |
| $c/\text{\AA}$               | 11.8168(3)                                                                    |
| $\alpha/^\circ$              | 72.911(2)                                                                     |
| $\beta/^\circ$               | 89.9231(19)                                                                   |
| $\gamma/^\circ$              | 80.201(2)                                                                     |
| $V/\text{\AA}^3$             | 885.87(4)                                                                     |
| $Z$                          | 2                                                                             |
| $Z'$                         | 1                                                                             |
| Wavelength/ $\text{\AA}$     | 1.54184                                                                       |
| Radiation type               | Cu K $\alpha$                                                                 |
| $Q_{min}/^\circ$             | 3.919                                                                         |
| $Q_{max}/^\circ$             | 80.012                                                                        |
| Measured Refl's.             | 14079                                                                         |
| Indep't Refl's               | 3815                                                                          |
| Refl's $I \geq 2\sigma(I)$   | 3553                                                                          |
| $R_{\text{int}}$             | 0.0406                                                                        |
| Parameters                   | 292                                                                           |
| Restraints                   | 0                                                                             |
| Largest Peak                 | 0.398                                                                         |
| Deepest Hole                 | -0.406                                                                        |
| GooF                         | 1.062                                                                         |
| $wR_2$ (all data)            | 0.1043                                                                        |
| $wR_2$                       | 0.1026                                                                        |
| $R_I$ (all data)             | 0.0392                                                                        |
| $R_I$                        | 0.0374                                                                        |

## Section S3. Enthalpy of formation

### Section S3.1. Isodesmic reactions

The  $\Delta H_f$  (enthalpy of formation) for new compounds was calculated by using isodesmic reactions (Scheme S1).



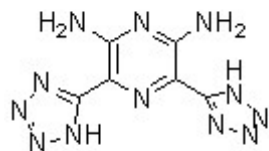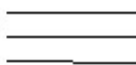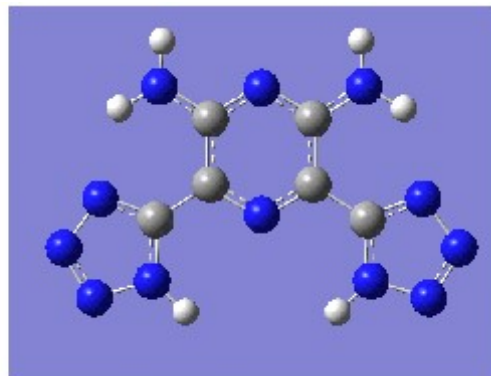

MP2=-887.1156709

Number of imaginary frequencies (NImag) = 0

Zero-point correction= 0.165819 (Hartree/Particle)  
 Thermal correction to Energy= 0.179612  
 Thermal correction to Enthalpy= 0.180557  
 Thermal correction to Gibbs Free Energy= 0.124318  
 Sum of electronic and zero-point Energies= -889.097852  
 Sum of electronic and thermal Energies= -889.084059  
 Sum of electronic and thermal Enthalpies= -889.083114  
 Sum of electronic and thermal Free Energies= -889.139353

| Center<br>Number | Atomic<br>Number | Atomic<br>Type | Coordinates (Angstroms) |           |           |
|------------------|------------------|----------------|-------------------------|-----------|-----------|
|                  |                  |                | X                       | Y         | Z         |
| 1                | 7                | 0              | -0.000025               | 2.407878  | -0.000130 |
| 2                | 7                | 0              | -0.000007               | -0.379495 | -0.000153 |
| 3                | 7                | 0              | 2.299091                | 2.436764  | 0.000107  |
| 4                | 1                | 0              | 2.237216                | 3.443631  | 0.000044  |
| 5                | 1                | 0              | 3.195834                | 1.959331  | 0.000146  |
| 6                | 7                | 0              | -2.299097               | 2.436785  | 0.000027  |
| 7                | 1                | 0              | -2.237195               | 3.443654  | 0.000291  |
| 8                | 1                | 0              | -3.195861               | 1.959374  | 0.000253  |
| 9                | 7                | 0              | 2.458480                | -1.834155 | -0.000247 |
| 10               | 1                | 0              | 1.716114                | -2.517907 | -0.000562 |
| 11               | 7                | 0              | 3.760505                | -2.205179 | -0.000121 |
| 12               | 7                | 0              | 4.446315                | -1.112521 | 0.000247  |
| 13               | 7                | 0              | 3.630236                | -0.024839 | 0.000257  |
| 14               | 7                | 0              | -2.458420               | -1.834194 | 0.000142  |
| 15               | 1                | 0              | -1.716056               | -2.517951 | 0.000092  |
| 16               | 7                | 0              | -3.760463               | -2.205173 | 0.000081  |
| 17               | 7                | 0              | -4.446317               | -1.112546 | 0.000135  |
| 18               | 7                | 0              | -3.630252               | -0.024873 | -0.000028 |
| 19               | 6                | 0              | 1.153493                | 1.728608  | -0.000032 |
| 20               | 6                | 0              | 1.153463                | 0.289467  | -0.000022 |
| 21               | 6                | 0              | -1.153489               | 0.289446  | -0.000156 |
| 22               | 6                | 0              | -1.153530               | 1.728594  | -0.000191 |
| 23               | 6                | 0              | 2.381084                | -0.485478 | -0.000006 |
| 24               | 6                | 0              | -2.381085               | -0.485517 | -0.000005 |

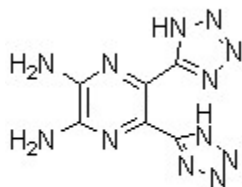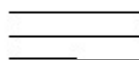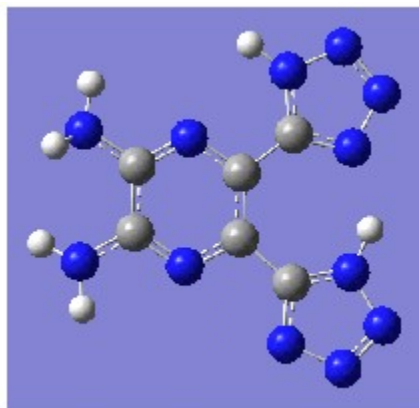

MP2=-887.1047897

Number of imaginary frequencies (NImag) = 0

|                                              |                             |
|----------------------------------------------|-----------------------------|
| Zero-point correction=                       | 0.165589 (Hartree/Particle) |
| Thermal correction to Energy=                | 0.179302                    |
| Thermal correction to Enthalpy=              | 0.180246                    |
| Thermal correction to Gibbs Free Energy=     | 0.123944                    |
| Sum of electronic and zero-point Energies=   | -889.074843                 |
| Sum of electronic and thermal Energies=      | -889.061131                 |
| Sum of electronic and thermal Enthalpies=    | -889.060187                 |
| Sum of electronic and thermal Free Energies= | -889.116489                 |

| Center<br>Number | Atomic<br>Number | Atomic<br>Type | Coordinates (Angstroms) |           |           |
|------------------|------------------|----------------|-------------------------|-----------|-----------|
|                  |                  |                | X                       | Y         | Z         |
| 1                | 7                | 0              | 1.389270                | -1.464425 | 0.061946  |
| 2                | 7                | 0              | 1.481135                | 1.286676  | -0.054889 |
| 3                | 7                | 0              | 3.708922                | -1.573690 | 0.099646  |
| 4                | 1                | 0              | 3.559236                | -2.562023 | 0.267374  |
| 5                | 1                | 0              | 4.482224                | -1.178259 | 0.619984  |
| 6                | 7                | 0              | -0.632439               | 2.928917  | -0.000703 |
| 7                | 1                | 0              | 0.248938                | 3.422903  | -0.029140 |
| 8                | 7                | 0              | -1.818607               | 3.565365  | 0.027237  |
| 9                | 7                | 0              | -2.722600               | 2.643750  | 0.058802  |
| 10               | 7                | 0              | -2.149354               | 1.412479  | 0.052501  |
| 11               | 6                | 0              | 2.543895                | -0.838419 | 0.059330  |
| 12               | 6                | 0              | 2.597790                | 0.592873  | -0.052087 |
| 13               | 6                | 0              | 0.281895                | 0.641583  | -0.005655 |
| 14               | 6                | 0              | 0.230466                | -0.766702 | 0.011192  |
| 15               | 6                | 0              | -0.833575               | 1.592626  | 0.013627  |
| 16               | 7                | 0              | 3.817709                | 1.240318  | -0.089995 |
| 17               | 1                | 0              | 3.757748                | 2.232346  | -0.283552 |
| 18               | 1                | 0              | 4.552719                | 0.772935  | -0.607195 |
| 19               | 7                | 0              | -0.909261               | -2.966995 | -0.066413 |
| 20               | 7                | 0              | -2.188357               | -3.390524 | -0.076747 |
| 21               | 7                | 0              | -3.016839               | -2.386167 | -0.032121 |
| 22               | 7                | 0              | -2.262314               | -1.279105 | 0.008221  |
| 23               | 1                | 0              | -2.648875               | -0.324191 | 0.040999  |
| 24               | 6                | 0              | -0.959277               | -1.635275 | -0.013217 |



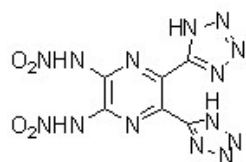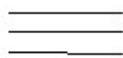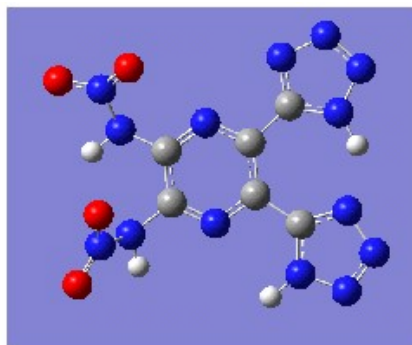

MP2=-1295.2306737

Number of imaginary frequencies (NImag) = 0

Zero-point correction= 0.168932 (Hartree/Particle)  
 Thermal correction to Energy= 0.187781  
 Thermal correction to Enthalpy= 0.188725  
 Thermal correction to Gibbs Free Energy= 0.117265  
 Sum of electronic and zero-point Energies= -1298.001845  
 Sum of electronic and thermal Energies= -1297.982996  
 Sum of electronic and thermal Enthalpies= -1297.982052  
 Sum of electronic and thermal Free Energies= -1298.053512

| Center<br>Number | Atomic<br>Number | Atomic<br>Type | Coordinates (Angstroms) |           |           |
|------------------|------------------|----------------|-------------------------|-----------|-----------|
|                  |                  |                | X                       | Y         | Z         |
| 1                | 6                | 0              | 0.856204                | 0.697448  | -0.166196 |
| 2                | 6                | 0              | 0.996357                | -0.720467 | -0.196843 |
| 3                | 7                | 0              | -0.094356               | -1.495016 | -0.366992 |
| 4                | 6                | 0              | -1.282170               | -0.943541 | -0.493363 |
| 5                | 6                | 0              | -1.420821               | 0.468200  | -0.480095 |
| 6                | 7                | 0              | -0.361658               | 1.238757  | -0.330249 |
| 7                | 7                | 0              | -2.664169               | 1.039787  | -0.721215 |
| 8                | 1                | 0              | -3.427523               | 0.445269  | -1.022019 |
| 9                | 7                | 0              | -2.395463               | -1.797639 | -0.723894 |
| 10               | 1                | 0              | -2.177603               | -2.673583 | -1.192965 |
| 11               | 7                | 0              | -3.183158               | 2.147673  | 0.005045  |
| 12               | 8                | 0              | -2.445601               | 2.733865  | 0.767373  |
| 13               | 8                | 0              | -4.357926               | 2.380358  | -0.252334 |
| 14               | 7                | 0              | -3.215846               | -2.106529 | 0.407869  |
| 15               | 8                | 0              | -3.259132               | -1.269366 | 1.295550  |
| 16               | 8                | 0              | -3.829348               | -3.157739 | 0.329271  |
| 17               | 7                | 0              | 1.693405                | 3.020453  | -0.021196 |
| 18               | 7                | 0              | 2.891882                | 3.604581  | 0.137087  |
| 19               | 7                | 0              | 3.840227                | 2.711644  | 0.243899  |
| 20               | 7                | 0              | 3.485126                | -1.160509 | 0.101938  |
| 21               | 7                | 0              | 4.219757                | -2.298911 | 0.180942  |
| 22               | 7                | 0              | 3.457545                | -3.336617 | 0.077582  |
| 23               | 7                | 0              | 2.203792                | -2.873529 | -0.071883 |
| 24               | 1                | 0              | 1.412683                | -3.496156 | -0.168227 |
| 25               | 7                | 0              | 3.246048                | 1.519320  | 0.152810  |
| 26               | 1                | 0              | 3.754480                | 0.623780  | 0.195015  |
| 27               | 6                | 0              | 1.916643                | 1.705342  | -0.012165 |
| 28               | 6                | 0              | 2.219137                | -1.522069 | -0.056821 |

### Section S3.3. Solid state enthalpy of formation

The gas state  $\Delta H_f$  of compound **2** is 731.6 kJ mol<sup>-1</sup>.

The gas state  $\Delta H_f$  of compound **5** is 759.7 kJ mol<sup>-1</sup>.

The gas state  $\Delta H_f$  of compound **6** is 909.8 kJ mol<sup>-1</sup>.

The calculated gas-phase enthalpy for compounds **2**, **5** and **6** is converted to solid phase values by subtracting the empirical heat of sublimation obtained based on Trouton's rule.<sup>10</sup>

**Compound 2:**  $\Delta H_{\text{sub}}$  (kJ mol<sup>-1</sup>) = 0.188·(273+305) = 108.7 kJ mol<sup>-1</sup>

**Compound 5:**  $\Delta H_{\text{sub}}$  (kJ mol<sup>-1</sup>) = 0.188·(273+320) = 111.5 kJ mol<sup>-1</sup>

**Compound 6:**  $\Delta H_{\text{sub}}$  (kJ mol<sup>-1</sup>) = 0.188·(273+212) = 91.2 kJ mol<sup>-1</sup>

**Table S3:** Solid state  $\Delta H_f$  for compounds using Trouton's rule.

| Compound | $\Delta H_f$ (g) kJ mol <sup>-1</sup> | $\Delta H_{\text{sub}}$ kJ mol <sup>-1</sup> | $\Delta H_f$ (s) kJ mol <sup>-1</sup> |
|----------|---------------------------------------|----------------------------------------------|---------------------------------------|
| <b>2</b> | 731.6                                 | 108.7                                        | 622.9                                 |
| <b>5</b> | 759.7                                 | 111.5                                        | 648.2                                 |
| <b>6</b> | 909.8                                 | 91.2                                         | 818.6                                 |

### Section S4. References

- [1] T. G. Witkowski, E. Sebastiao, B. Gabidullin, A. Hu, F. Zhang and M. Murugesu, *ACS Appl. Energy Mater.*, 2018, **1**, 589–593.
- [2] Y. Wang, J. Liu, J. He, X. Ren, L. Hu and S. Pang, *Chem. Commun.*, 2025, **61**, 13433–13436.
- [3] D. E. Chavez and M. A. Hiskey, *J. Heterocycl. Chem.*, 1998, **35**, 1329–1332.
- [4] G. M. Sheldrick, *Acta Crystallogr. Sect. A Found. Crystallogr.* 2008, **64**, 112–122.
- [5] G. M. Sheldrick, *Acta Crystallogr. Sect. A Found. Adv.* 2015, **71**, 3–8.

- [6] O. V. Dolomanov, L. J. Bourhis, R. J. Gildea, J. A. K. Howard and H. Puschmann, *J. Appl. Crystallogr.* 2009, **42**, 339–341.
- [7] R. G. Parr, Y. Weitao, *Density-Functional Theory of Atoms and Molecules* (Oxford University Press, 1995).
- [8] O. Suleimenov and T.-K. Ha, *Chem. Phys. Lett.* 1998, **290**, 451–457.
- [9] H. D. B. Jenkins, D. Tudela and L. Glasser, *Inorg. Chem.* 2002, **41**, 2364–2367.
- [10] M. S. Westwell, M. S. Searle, D. J. Wales, D. H. Williams, *J. Am. Chem. Soc.* 1995, **117**, 5013–5015.

## Section S5. Spectrum Analysis

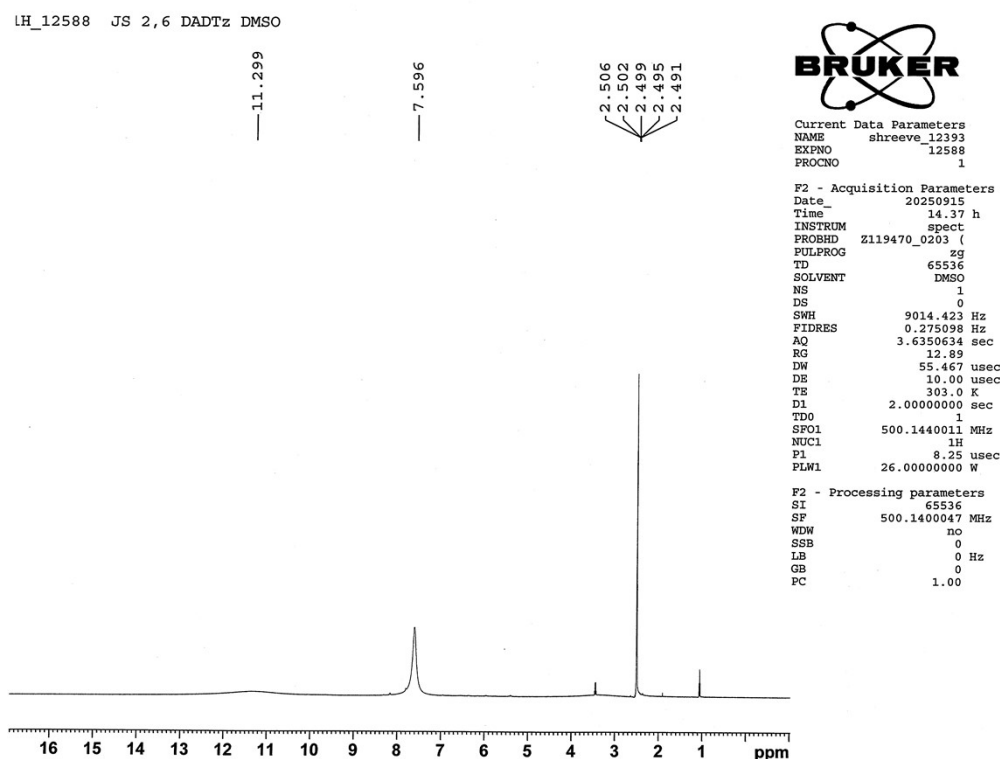

Figure S1:  $^1\text{H}$  NMR spectrum for compound **2**.

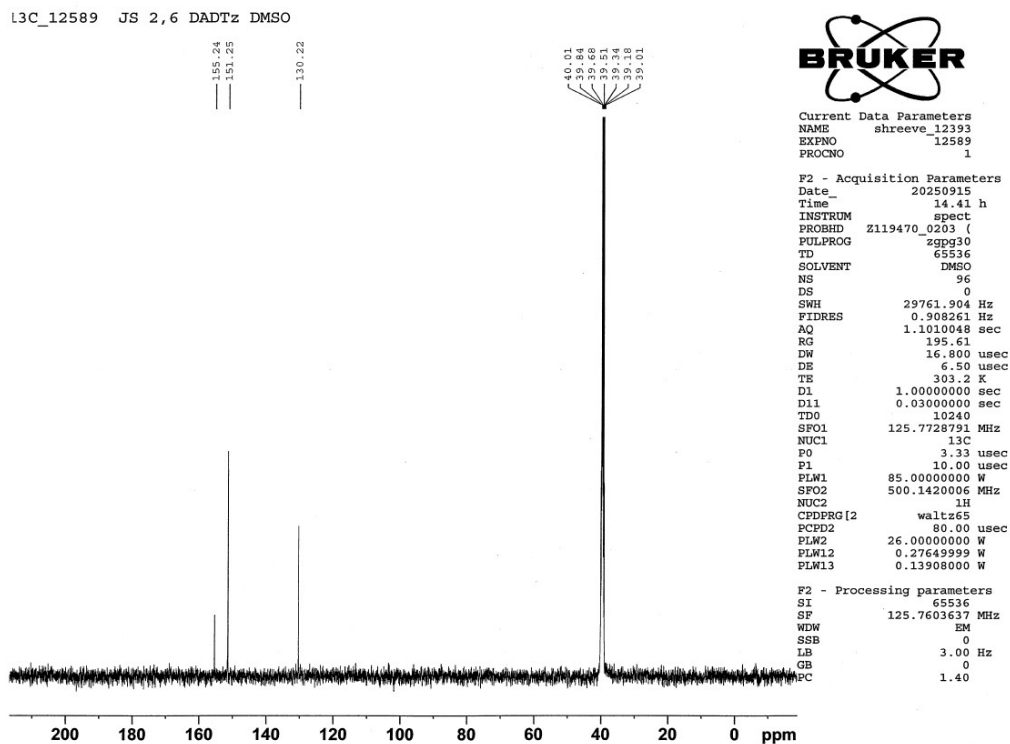

Figure S2: <sup>13</sup>C NMR spectrum for compound 2.

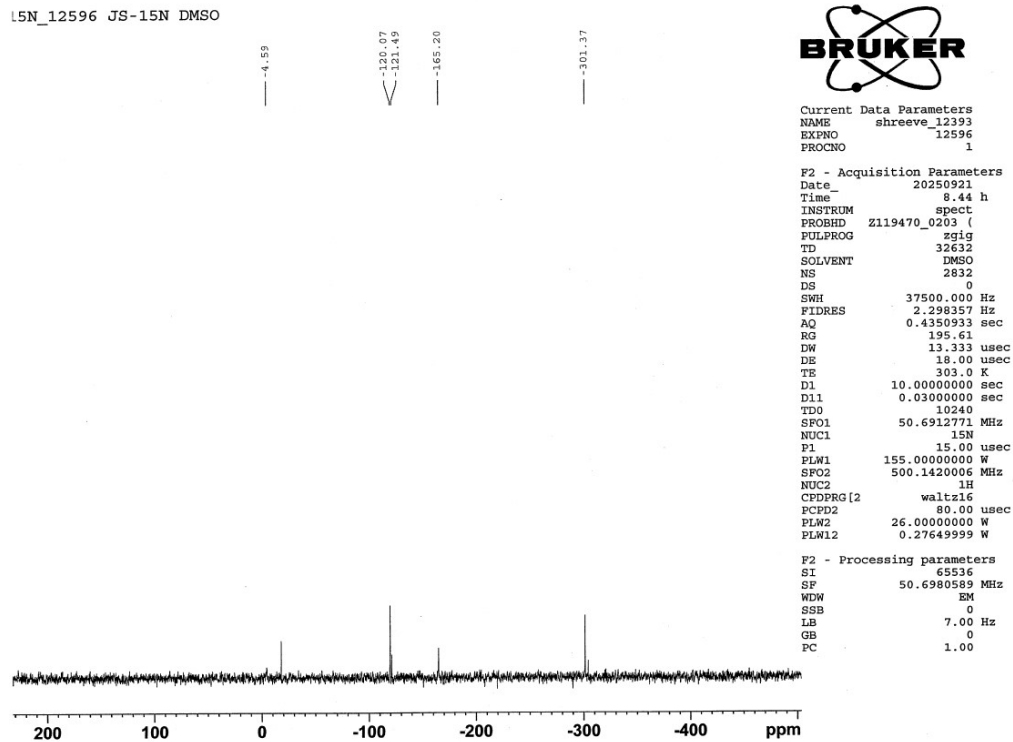

Figure S3: <sup>15</sup>N NMR spectrum for compound 2.

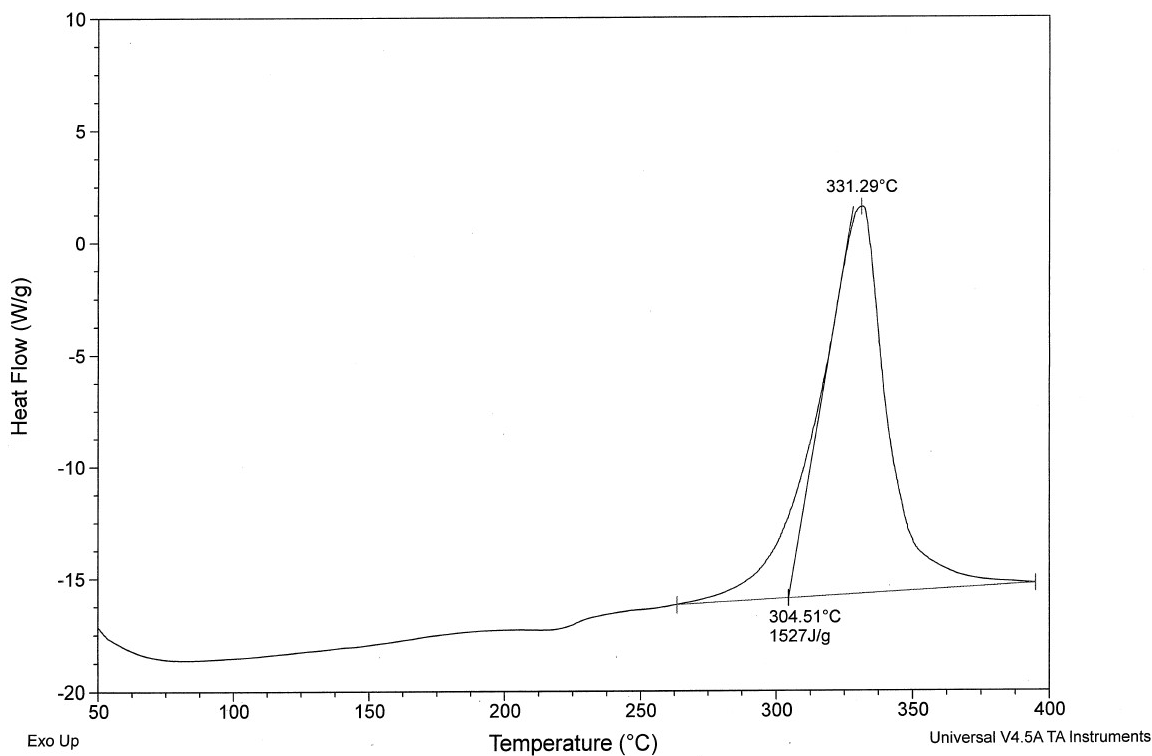

**Figure S4:** DSC plot for compound 2.

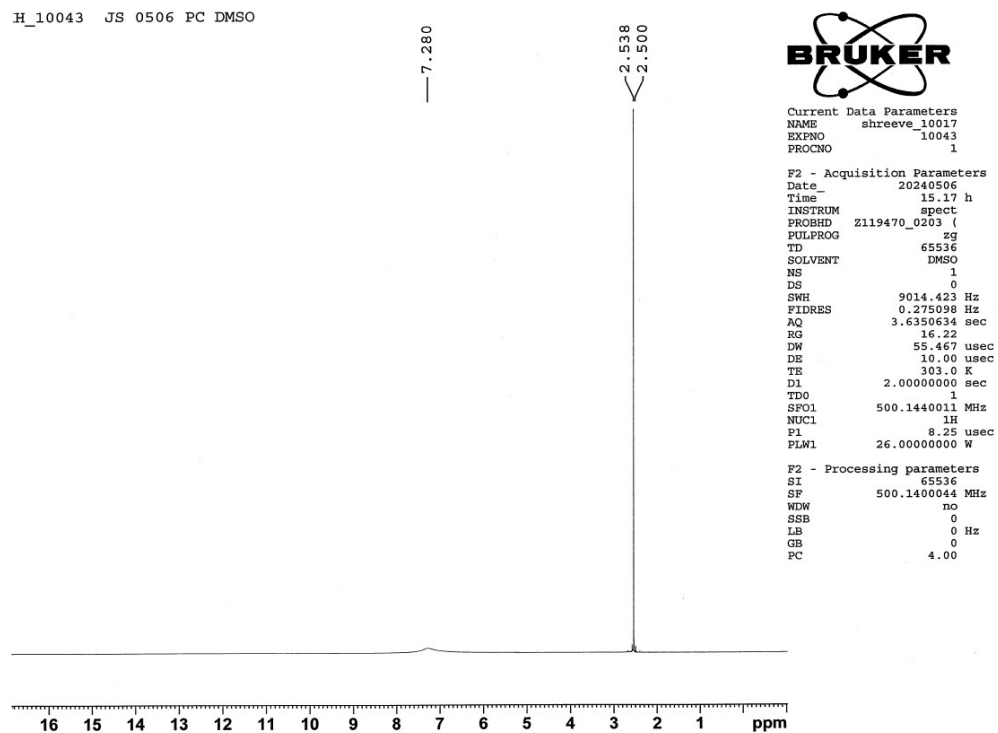

**Figure S5:**  $^1\text{H}$  NMR spectrum for compound 4.

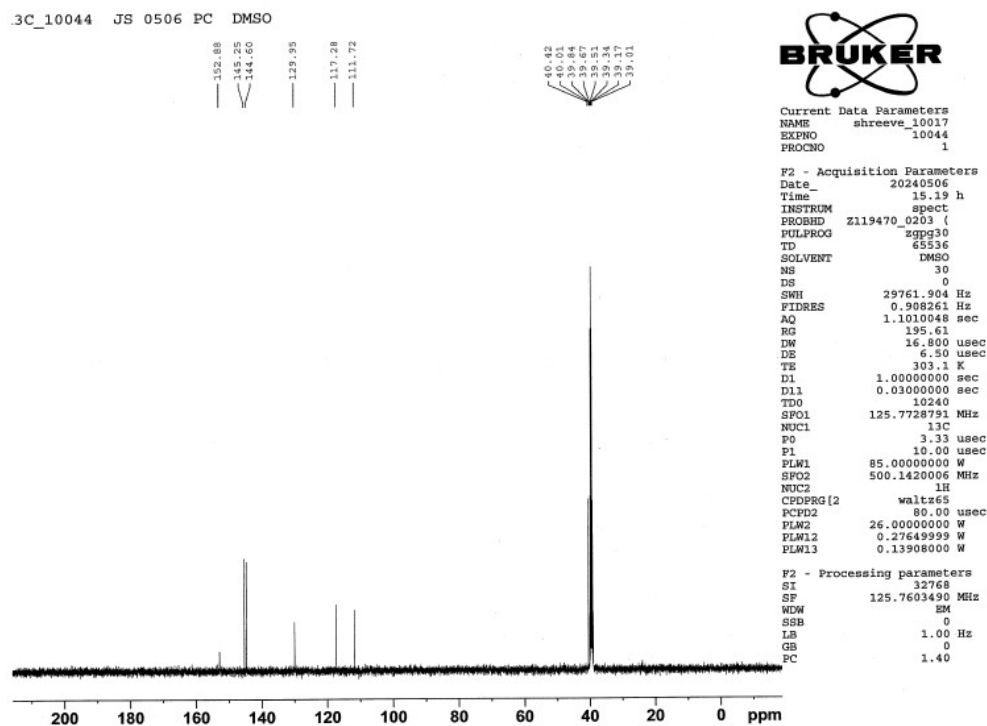

Figure S6:  $^{13}\text{C}$  NMR spectrum for compound 4.

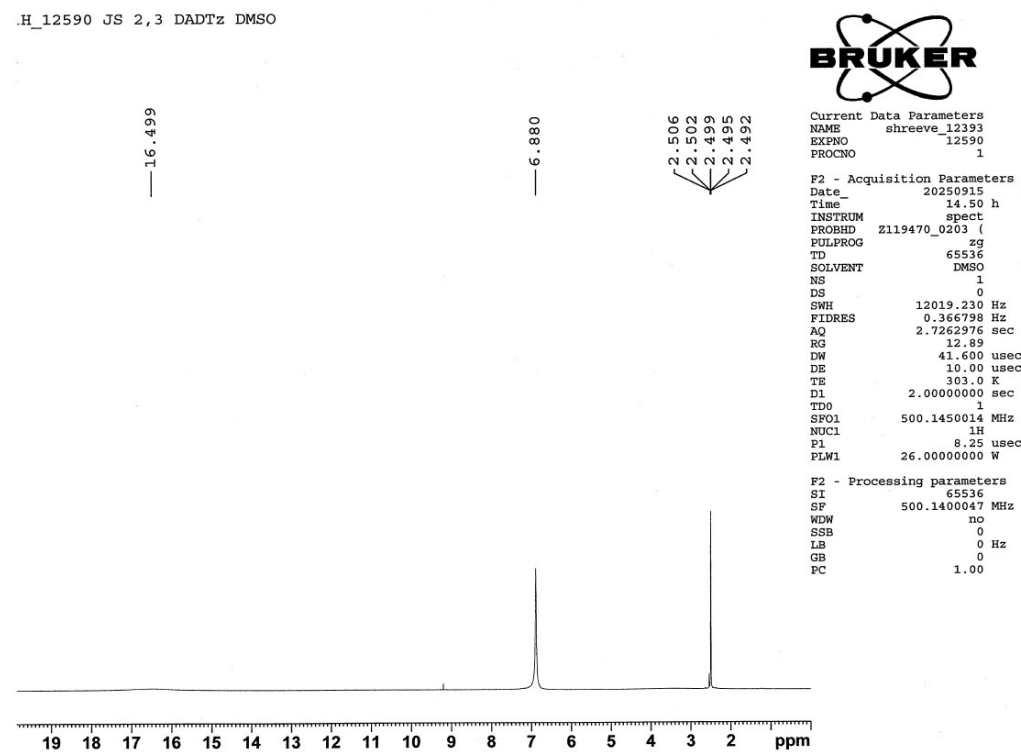

Figure S7:  $^1\text{H}$  NMR spectrum for compound 5.

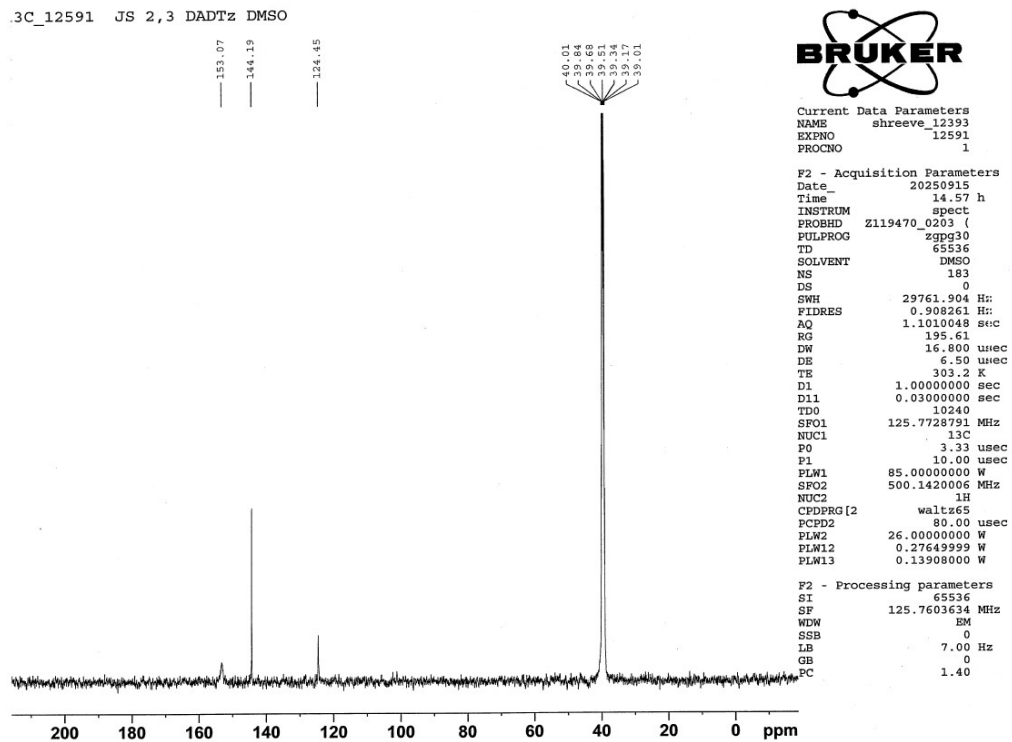

Figure S8:  $^{13}\text{C}$  NMR spectrum for compound 5.

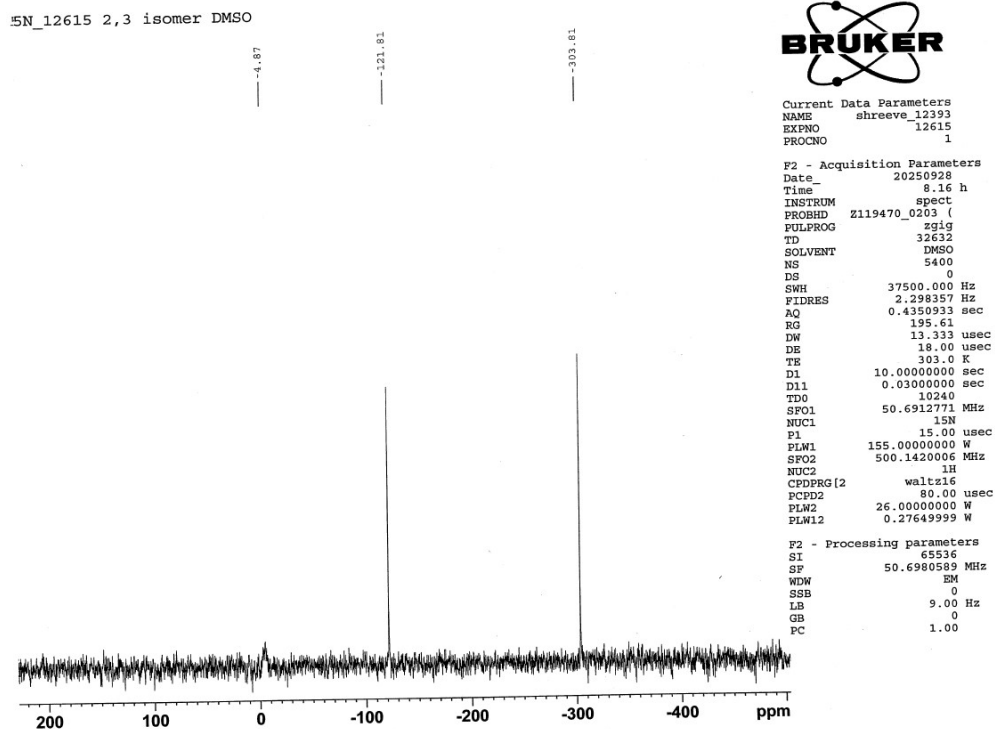

Figure S9:  $^{15}\text{N}$  NMR spectrum for compound 5.

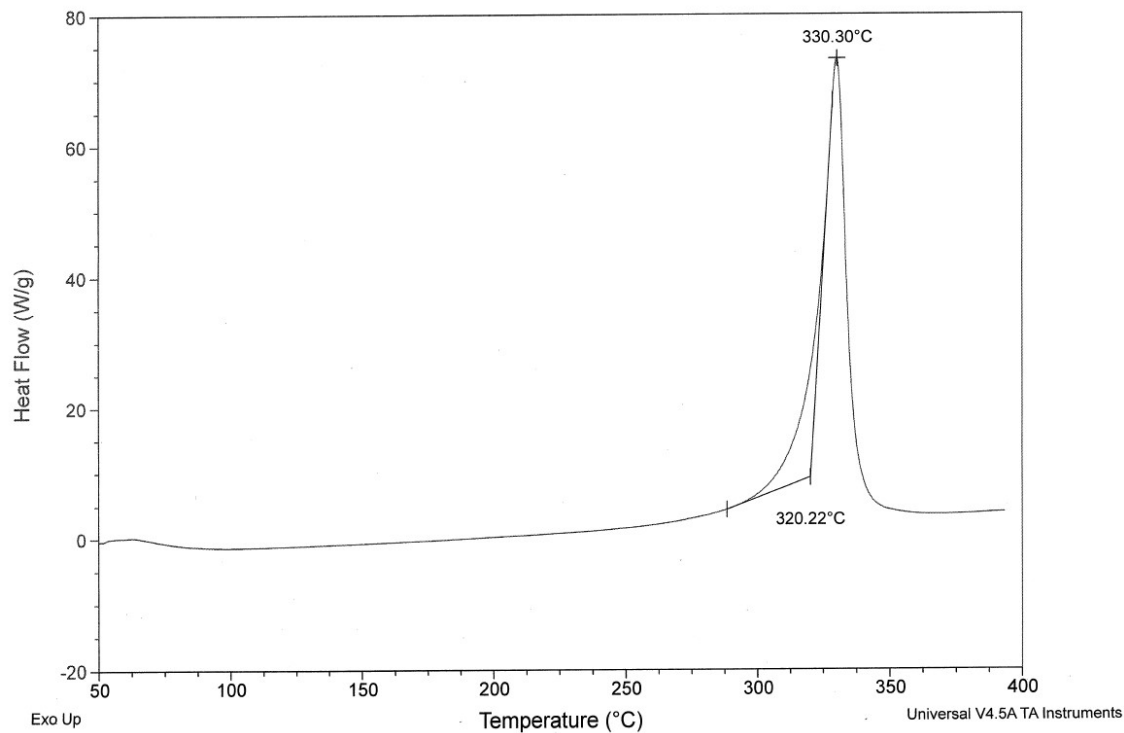

**Figure S10:** DSC plot for compound 5.

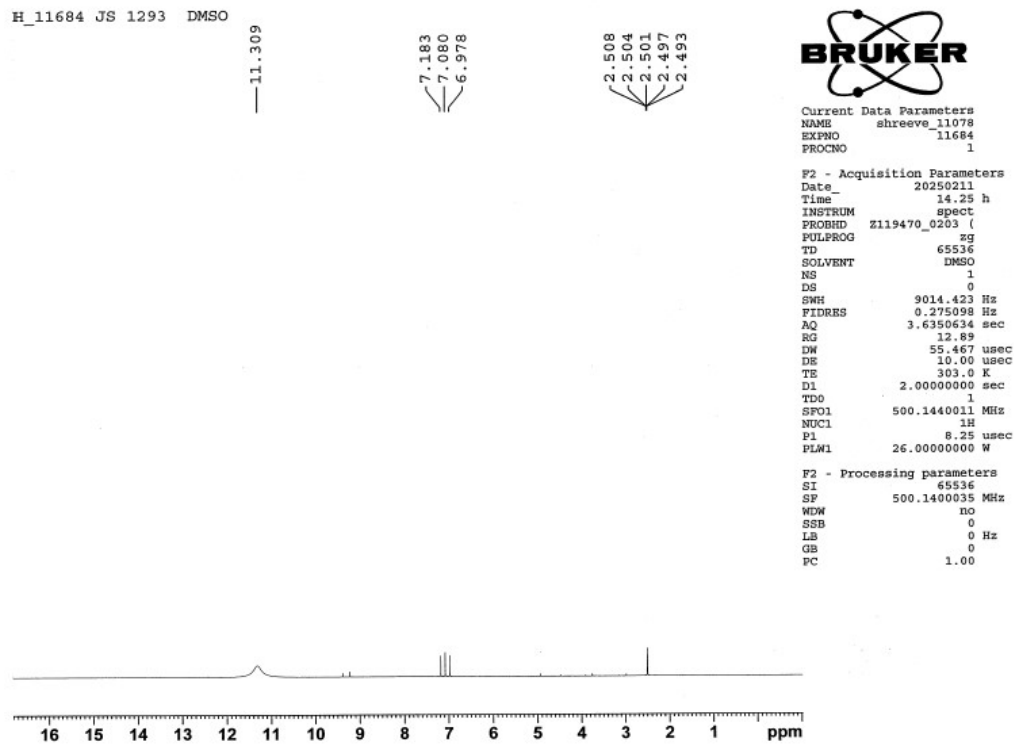

**Figure S11:**  $^1\text{H}$  NMR spectrum for compound 6.



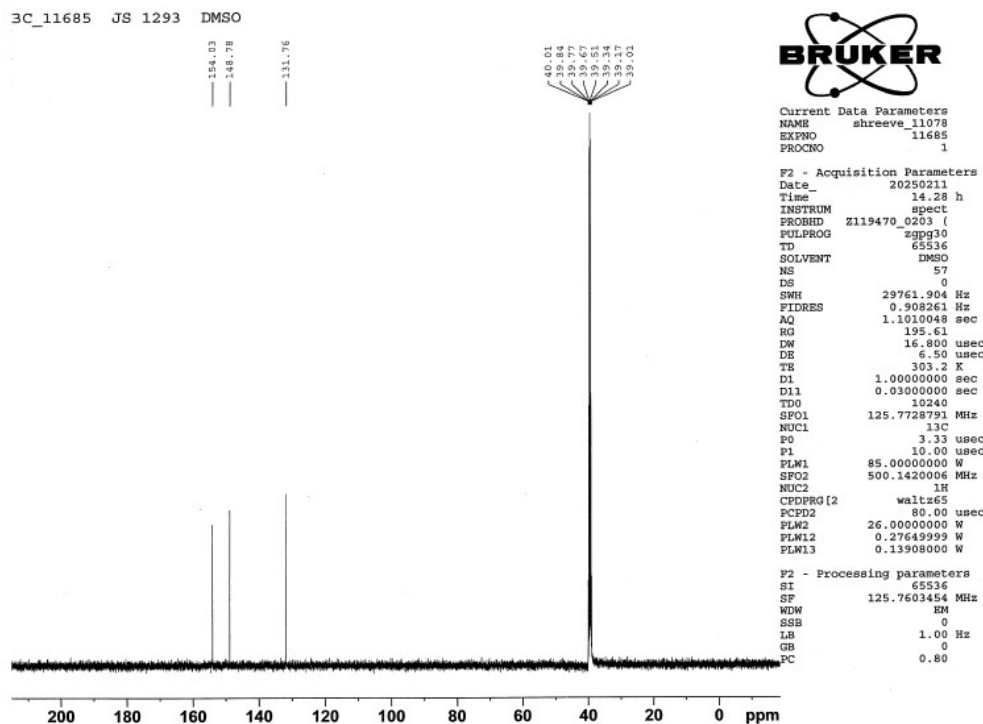

Figure S12:  $^{13}\text{C}$  NMR spectrum for compound 6.

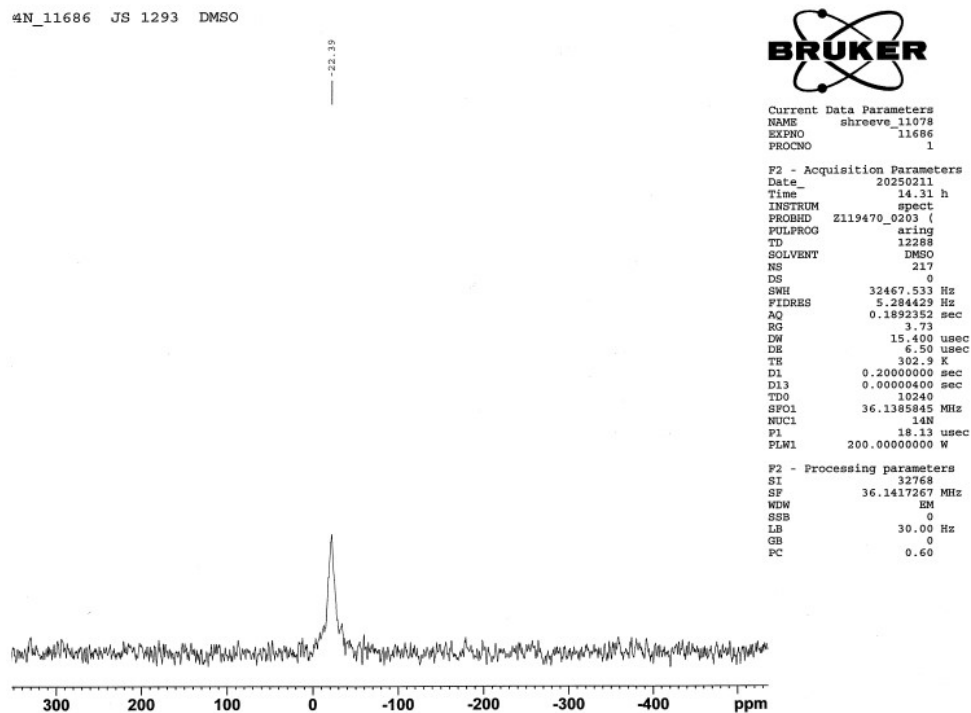

Figure S13:  $^{14}\text{N}$  NMR spectrum for compound 6.

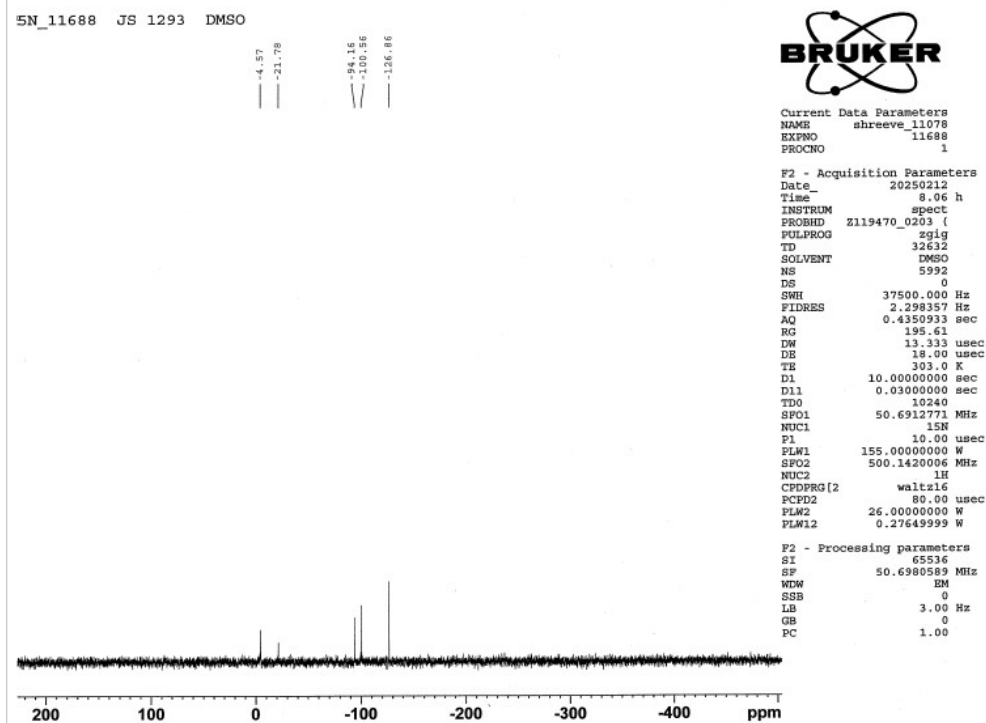

**Figure S14:**  $^{15}\text{N}$  NMR spectrum for compound **6**.

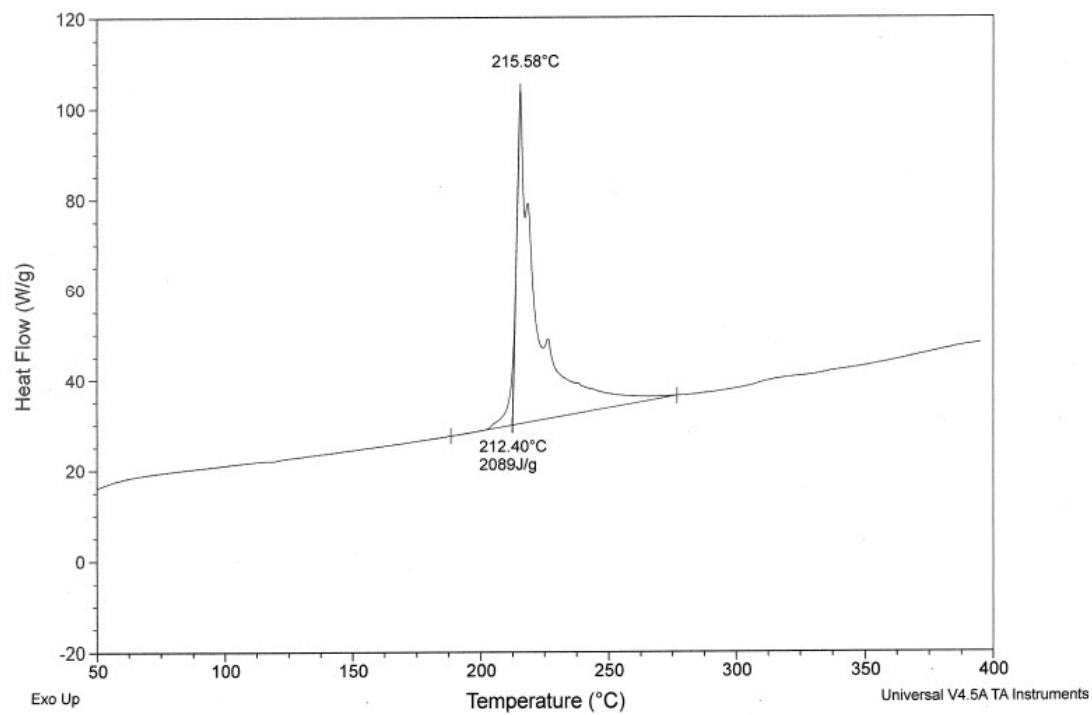

**Figure S15:** DSC plot for compound **6**.
